# Supplementary material for: Metabolic reconstruction of the archaeon methanogen Methanosarcina Acetivorans
Source: Springer Nature journal article supplement (doi:10.1186/1752-0509-5-28), 2011-02-15

## A) Growth on methanol

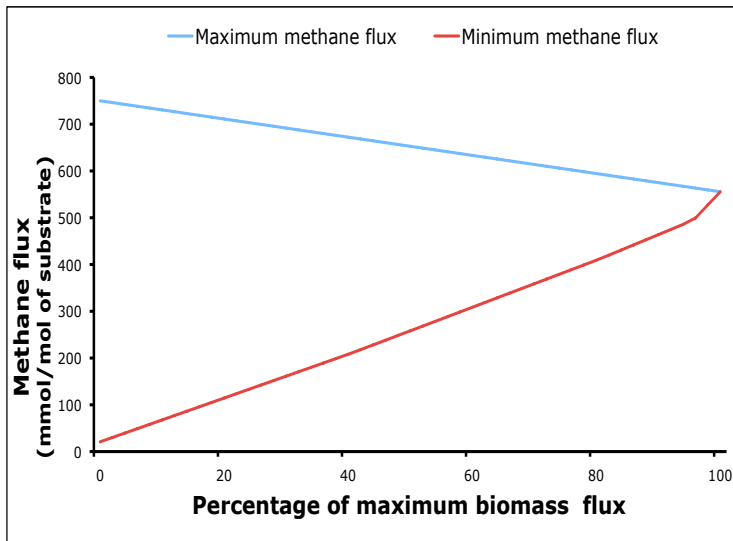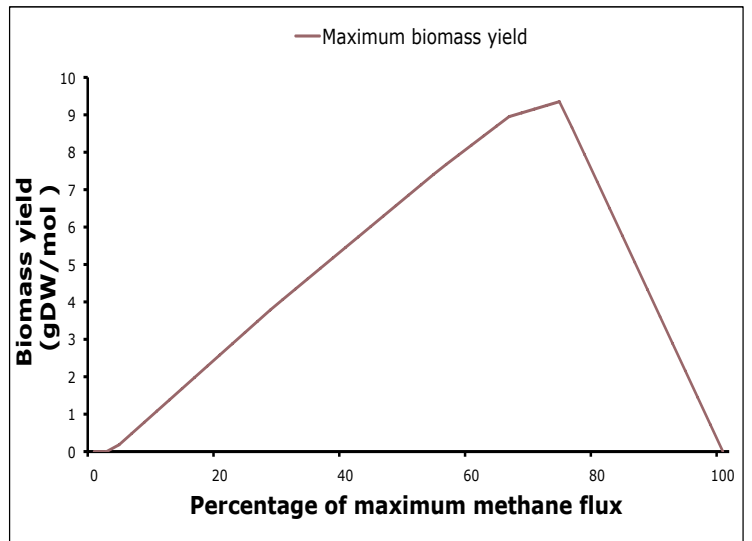

## B) Growth on acetate

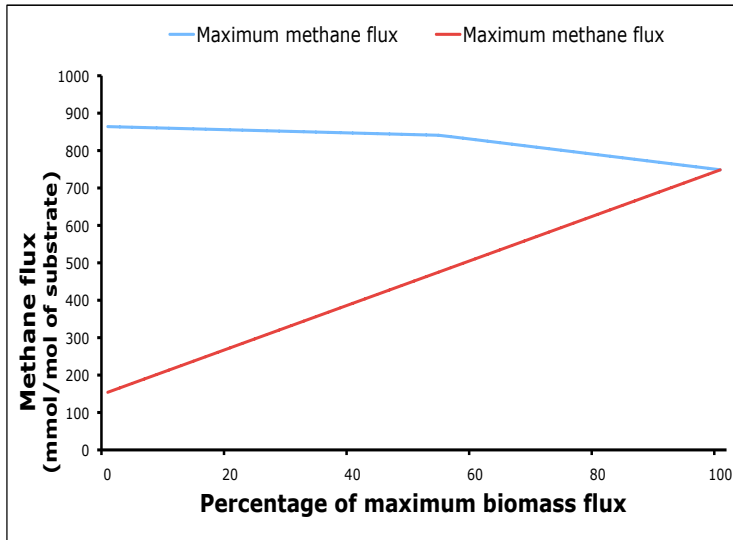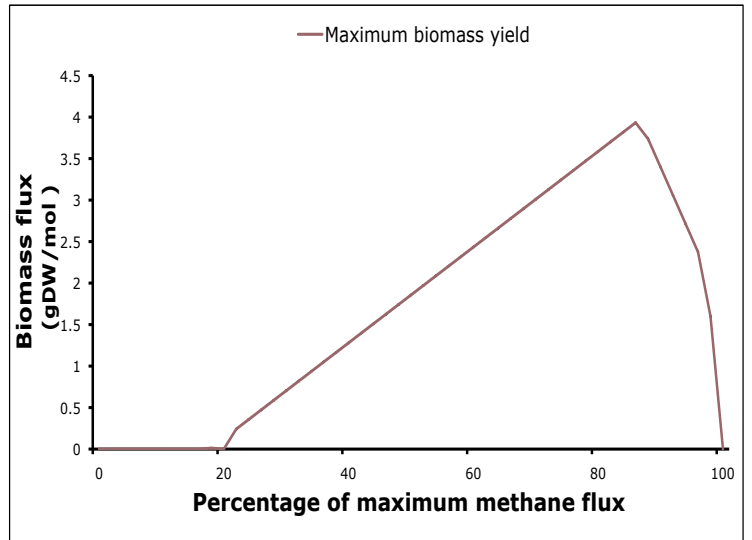

## C) Growth on carbon monoxide

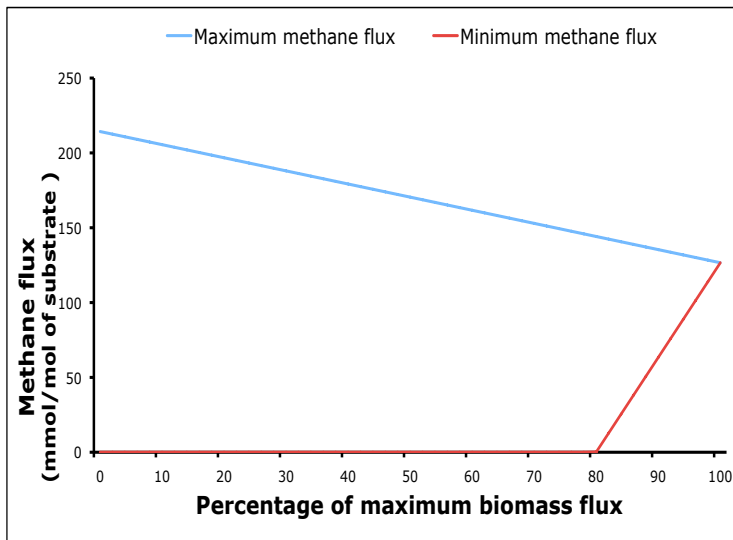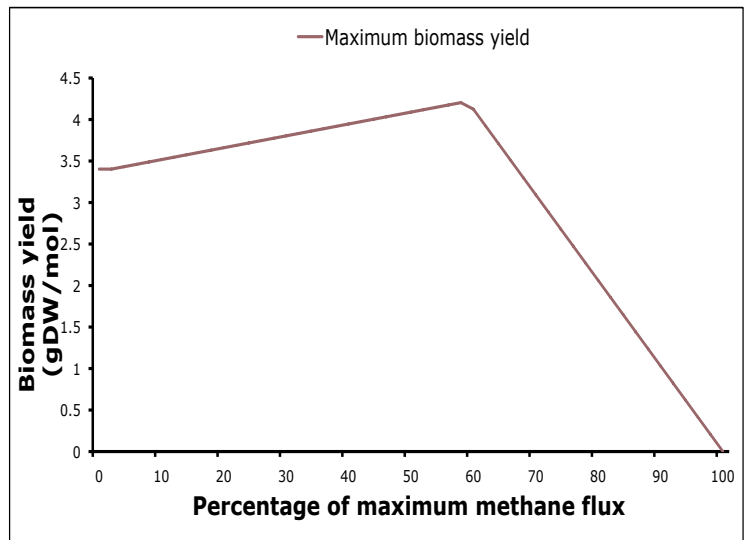

Supplement: 12918_2010_620_MOESM4_ESM.pdf [file 12918_2010_620_MOESM4_ESM.pdf]
